# Supplementary material
Source: PubMed Central journal article supplement (PMC3024756)
Supplement: supp_M110.177014_jbc.M110.177014-1.pdf [file supp_M110.177014_jbc.M110.177014-1.pdf]

## SUPPLEMENTARY DATA

**Fig. S1. Purification of recombinant A-CAT constructs.** The Coomassie blue-stained SDS gels show wild-type (WT) and mutant constructs of A-CAT purified from *E. coli*. Constructs were purified as described in Materials and Methods. The  $\Delta 831$ ,  $\Delta 823$  and  $\Delta 809$  constructs are truncated at the indicated C-terminal residue, 5xA has Ser553, Thr612, Thr613, Thr614 and Thr634 converted to alanine, RRGT and RRGS have Gln822 and Gln823 mutated to arginine and RRGS has Thr825 mutated to serine,  $\Delta 3$  has residues 812-814 deleted,  $\Delta 6$  has residues 810-815 deleted and BT is the A-CAT-MHCK B chimera. None of the truncations or mutations significantly altered the expression of A-CAT or its ability to be purified.

**Fig. S2. Detailed view of the Pi binding site and its connection to the active-site loop.** The  $2F_o - F_c$  electron density map, contoured at  $2\sigma$  level (gray mesh), of Pi, Lys684, Arg734 and Asp762 in the Pi-pocket of A-CAT- $\Delta 809$ . Thr736, Asp756 and Asp766 are shown as sticks. Arg734 bridges the Pi molecule to Asp762 to anchor the active site loop containing the invariant Asp756 and Asp766 catalytic residues.

**Fig. S3. Top-scoring FloppyTail and FlexPepDock models of the C-tail at the Pi-pocket.** (A) The two top-scoring models of the C-tail from the Floppy-Tail protocol, out of 5500 that were generated, are shown. The pThr825 residue was constrained to occupy the Pi-pocket. The two models were selected since they had nearly identical Rosetta energy, and moreover, were nearly identical structurally. This is remarkable considering that the only bias on the sampling was over the position of pThr285. (B) Residues 823-830 for the two top-scoring FloppyTail protocol models are shown in transparent magenta and red sticks, respectively. The two top-scoring models following refinement using the FlexPepDock protocol are shown in blue and cyan sticks. Polar bonds are highlighted in green. The two models converged indicating a strong signal for this binding mode.

**Fig. S4. The top 10 scoring models of the C-tail at the active site.** An ensemble of the ten top-scoring FloppyTail and FlexPepDock models of the C-tail at the active site is shown. The Thr825 residue was loosely constrained to occupy a position close to Asp756, which is predicted to be the catalytic base. ATP is shown as sticks in the active site. The models show that the C-tail can adopt a number of different conformations that allows Thr825 to access the active site.

**Fig. S5. A multiple sequence alignment of 20 MHCK/eEF2K family members.** The top panel shows that the residues that comprise the Pi-pocket (Lys684, Arg734 and Thr736 in MHCK A) and the catalytic loop (Asp756, Asp762 and Asp766 in MHCK A) are invariant in the MHCK/eEF2K branch of the  $\alpha$ -kinases. The bottom panel shows that a threonine-hydrophobic sequence corresponding to Thr825 in MHCK A is present in the C-tail regions of all MHCK/eEF2K family members. The full names of the organisms and the NCBI protein accession numbers are: *Caenorhabditis elegans* eEF2K (NP\_001022572); chicken eEF2K (XP\_414920); *Ciona intestinalis* eEF2K (XP\_002124480); *Danio rerio* eEF2K (NP\_001002740); *Dictyostelium discoideum* AK1 (XP\_629868), MHCK A (XP\_635119), MHCK B (XP\_636368), MHCK C (XP\_635600), and MHCK D (XP\_640080); *Dictyostelium purpureum* AK1 (DPU0059919), MHCK A (DPU0073191) and MHCK D (PU0070677); *Hydra magnipapillata* eEF2K (XP\_002162308), mouse eEF2K (NP\_031934); *Phytophthora ramorum*  $\alpha$ -kinase1 (sequence ID 72635; genome.jgi-psf.org/Phyra1\_1); *Polysphondylium pallidum* AK1 (EFA84766), MHCK A (EFA85481) and MHCK D (EFA85552); *Trichoplax adhaerens* eEF2K (XP\_002118108); and *Xenopus tropicalis* eEF2K (NP\_001120146).

**Table S1. Data collection and refinement statistics.**

---

|                                                      | ACAT- $\Delta$ 809<br>ADP           |
|------------------------------------------------------|-------------------------------------|
| <b>Data collection</b>                               |                                     |
| Space group                                          | <i>P2<sub>1</sub>2<sub>1</sub>2</i> |
| Cell dimensions                                      |                                     |
| <i>a, b, c</i> (Å)                                   | 77.1, 83.7, 44.7                    |
| $\alpha, \beta, \gamma$ (°)                          | 90, 90, 90                          |
| Resolution (Å)                                       | 30-1.8                              |
| <i>R</i> <sub>merge</sub>                            | 0.11 (0.45)                         |
| <i>I</i> / $\sigma$ <i>I</i>                         | 21.8 (4.4)                          |
| Completeness (%)                                     | 99.2(99.9)                          |
| Redundancy                                           | 5.6 (5.5)                           |
| <b>Refinement</b>                                    |                                     |
| Resolution (Å)                                       | 30-1.8                              |
| No. reflections                                      | 43603                               |
| <i>R</i> <sub>work</sub> / <i>R</i> <sub>free</sub>  | 0.2/0.23                            |
| No. atoms                                            |                                     |
| Protein                                              | 1988                                |
| Nucleotide/Mg <sup>2+</sup> /                        | 26/2/                               |
| Zn <sup>2+</sup> / H <sub>2</sub> PO <sub>4</sub> or | 1/10                                |
| SO <sub>4</sub> <sup>2+</sup>                        |                                     |
| Water                                                | 299                                 |
| <i>B</i> -factors                                    |                                     |
| Protein                                              | 19.8                                |
| Nucleotide/Mg <sup>2+</sup> /                        | 24.2 /29.3 /16.3 /                  |
| Zn <sup>2+</sup> / H <sub>2</sub> PO <sub>4</sub>    | 18.4                                |
| R.m.s. deviations                                    |                                     |
| Bond lengths                                         | 1.39                                |
| (Å)                                                  |                                     |
| Bond angles (°)                                      | 0.007                               |

---

Supplemental Data, Crawley *et al.*  
Figure S1

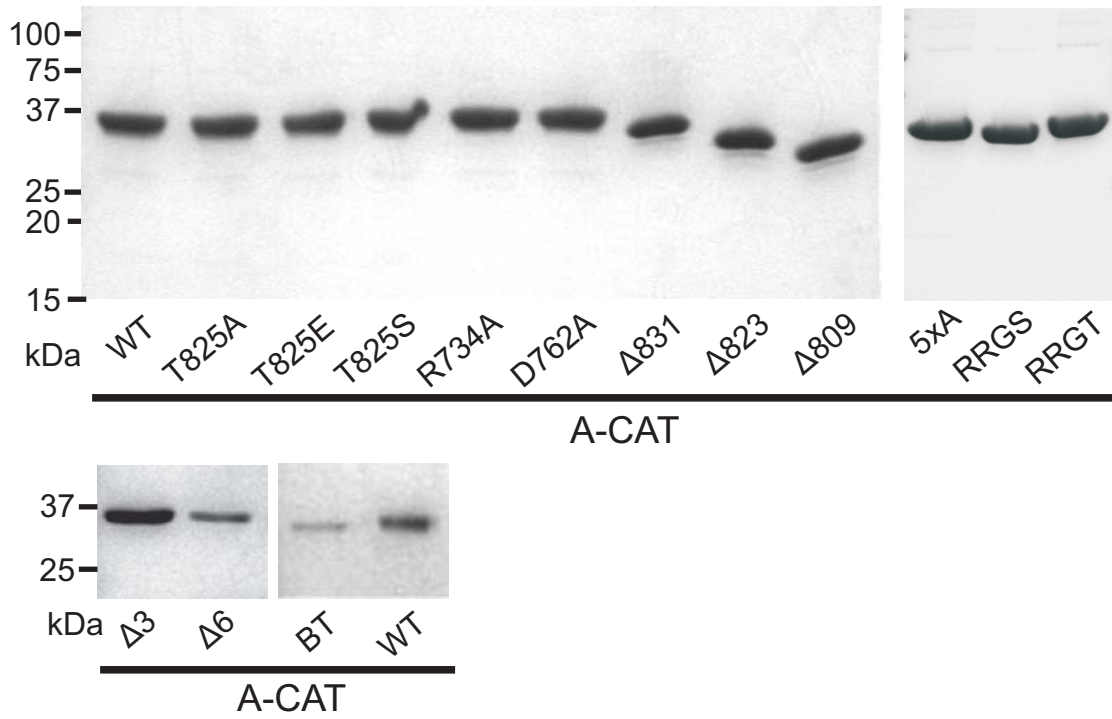

Supplemental Data, Crawley *et al.*

Figure S2

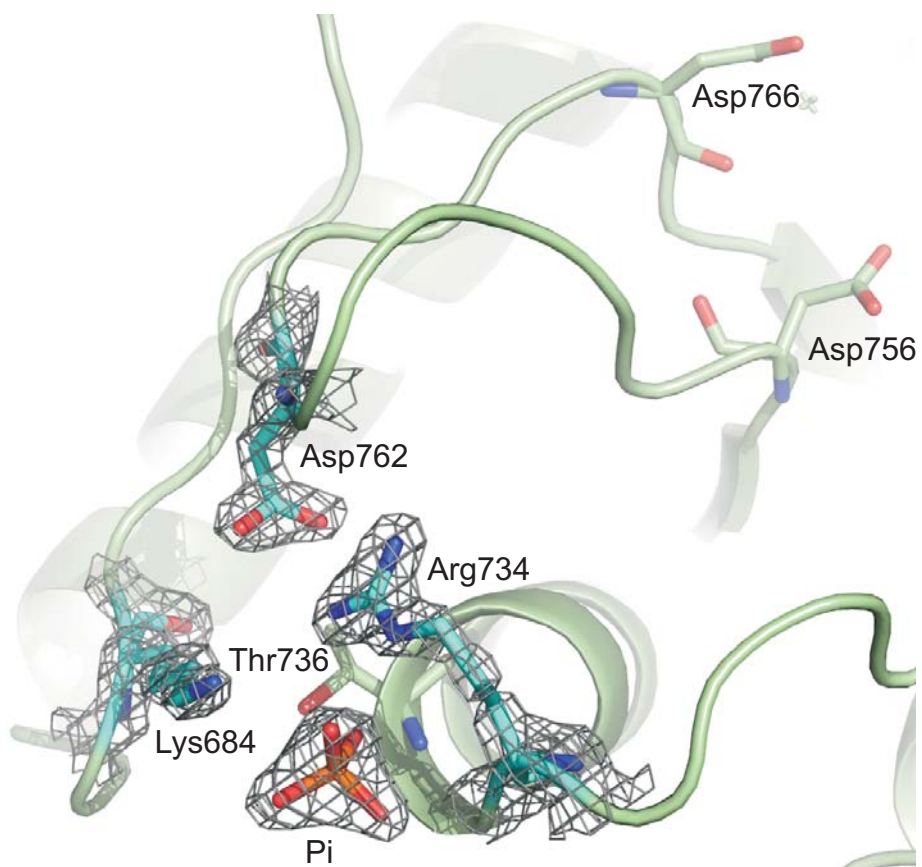

Supplemental Data, Crawley *et al.*

Figure S3

A

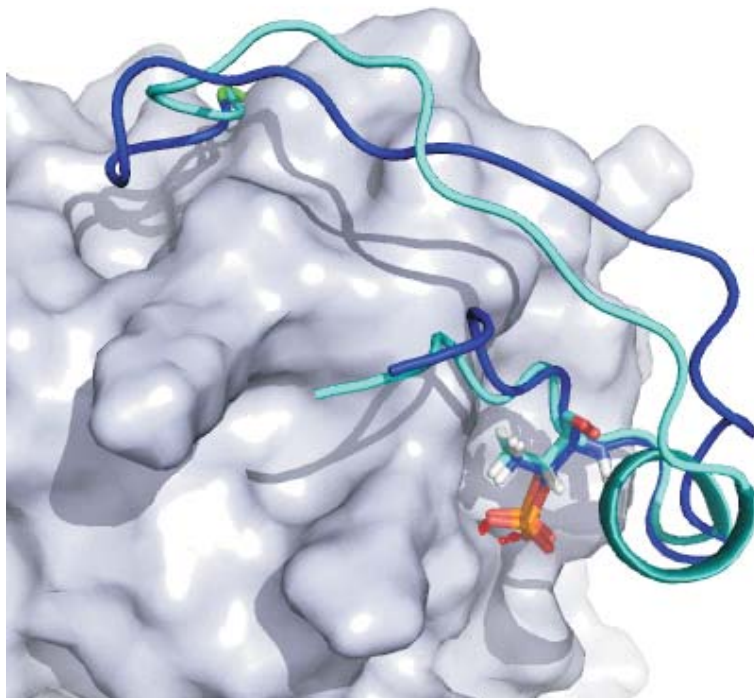

B

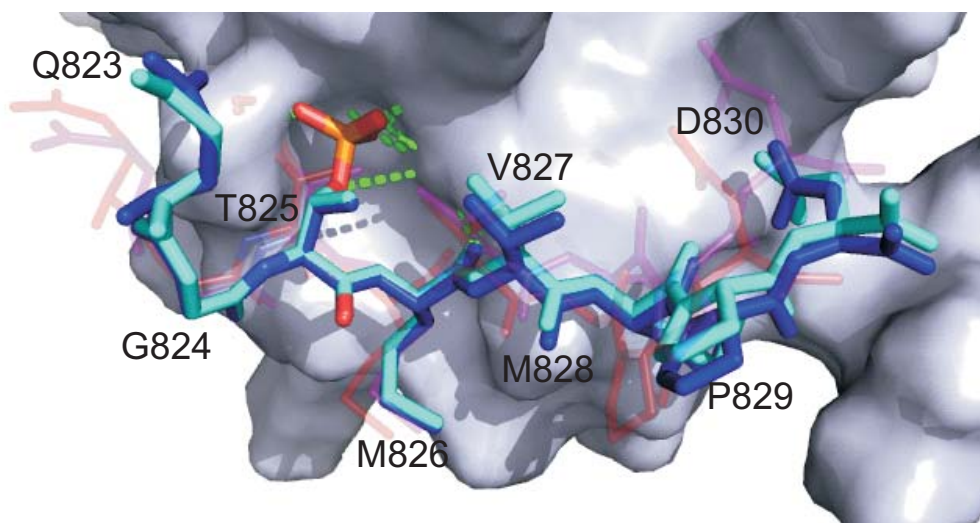

Supplemental Data, Crawley *et al.*  
Figure S4

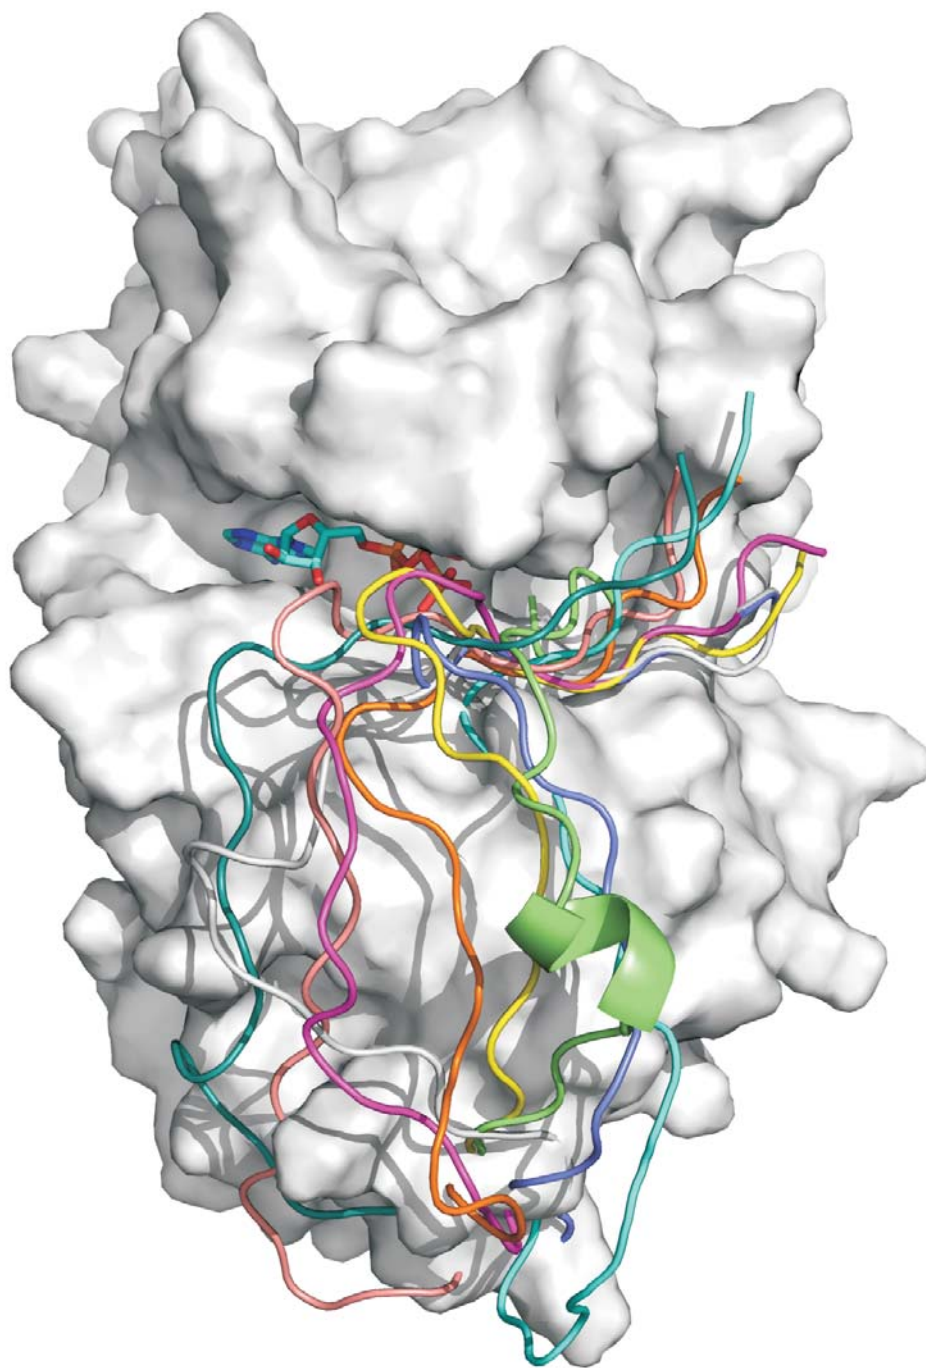

# Supplemental Data, Crawley *et al.*

## Figure S5

|             | Pi-Pocket |     |        | Catalytic Loop |         |        |
|-------------|-----------|-----|--------|----------------|---------|--------|
|             | 684       | 734 | 736    | 756            | 762     | 766    |
| Caee_EF2K   | PPKKI     | --- | ARLTPQ | ---            | DIQGVGD | LDLYTD |
| Chick_EF2K  | PPKQV     | --- | IRLTPQ | ---            | DIQGVGD | LDLYTD |
| Cioi_EF2K   | PPKQV     | --- | ARTTPQ | ---            | DIQGVGD | LWTD   |
| Danr_EF2K   | PPKQV     | --- | IRLTPQ | ---            | DIQGVGD | LDLYTD |
| Dicd_AK1    | PPKKI     | --- | DRNTPQ | ---            | DIQGVGD | VDLYTD |
| Dicd_MHCKA  | PPKKI     | --- | NRSTPQ | ---            | DIQGVGD | LDLYTD |
| Dicd_MHCKB  | PPKKI     | --- | ERNTPQ | ---            | DIQGVGD | DHYTD  |
| Dicd_MHCKC  | PPKPI     | --- | ARNTPQ | ---            | DIQGVND | DFYTD  |
| Dicd_MHCKD  | PPKKI     | --- | ERNTPQ | ---            | DIQGVDD | IYTD   |
| Dicp_AK1    | PPKKI     | --- | DRNTPQ | ---            | DIQGVGD | VDLYTD |
| Dicp_MHCKA  | PPKKI     | --- | NRSTPQ | ---            | DIQGVDD | LDLYTD |
| Dicp_MHCKC  | PPKPI     | --- | ARNTPQ | ---            | DIQGVND | DFYTD  |
| Hydm_EF2K   | PPKKI     | --- | VRATPQ | ---            | DIQGVGD | LDLYTD |
| Mouse_eEF2K | PPKQV     | --- | IRLTPQ | ---            | DIQGVGD | LDLYTD |
| Phyr_1      | PPKRV     | --- | ERNTPQ | ---            | DIQGVGD | LDLYTD |
| Polp_AK1    | PPKKI     | --- | DRNTPH | ---            | DIQGVAD | VDLYTD |
| Polp_MHCKA  | PPKKI     | --- | NRSTPQ | ---            | DIQGVDD | LDLYTD |
| Polp_MHCKD  | PPKNI     | --- | DRNTPQ | ---            | DIQGVDD | DHYTD  |
| Tria_EF2K   | PPKQV     | --- | LRATPQ | ---            | DVQGVGD | LDLYTD |
| Xent_EF2K   | PPKQV     | --- | IRLTPQ | ---            | DVQGVGD | LDLYTD |

  

|             | C-Tail                 |                    |
|-------------|------------------------|--------------------|
|             | 805                    | 825                |
| Caee_EF2K   | LSNFELSPPEIEATEVAMEVA  | AKQKKSCIVPPTVFEAR  |
| Chick_EF2K  | LAPFDLSSKEKDALDHSNKL   | -----LESAQTI LRGT  |
| Cioi_EF2K   | LSPFDLTFHEKSNCRRASV    | -----FARRGTLPTGY   |
| Danr_EF2K   | LTRFDLSPAELAQLDCTNKL   | -----LQSAKTVLRGF   |
| Dicd_AK1    | LSSVNPKPA              | -----NDESGTMPRPP   |
| Dicd_MHCKA  | LDVKLGGVLSGNNKK        | -----QLQQGTMVMMPD  |
| Dicd_MHCKB  | LQSINPKSE              | -----KSDCGTVPRPD   |
| Dicd_MHCKC  | LKPINQSKK              | -----ALLRGTLPVVQ   |
| Dicd_MHCKD  | LPPIGLETGRNAH          | -----RVIRGTMLLPD   |
| Dicp_AK1    | LSAVNPKPA              | -----NDESGTMPKPP   |
| Dicp_MHCKA  | LDVKLGGVLSGNNKK        | -----QLQQGTMVMMPD  |
| Dicp_MHCKC  | LKPINQSKK              | -----ALLRGTLPVVQ   |
| Hydm_EF2K   | LKKFDLSEEEKRIDNAGSKSSS | ST--ELKSDTFSGSS    |
| Mouse_eEF2K | LTPFDLSPREQDAVNQSTRL   | -----LQSAQTI LRGT  |
| Phyr_1      | LPAVNPKSR              | -----HADSGTLPVQE   |
| Polp_AK1    | LNSVNPKPL              | -----TDDSGTVPKPPQ  |
| Polp_MHCKA  | LDVKLGGSSLSLTK         | -----GQLKGTVMVMMPD |
| Polp_MHCKD  | LPPIGVDLTDNRNIT        | -----RVIRGTMALPD   |
| Tria_EF2K   | LGTFDLSSNGKQRLLSQFS    | -----NQSSSTLSIQD   |
| Xent_EF2K   | LTPFDLSAKEKAVLDNCSKM   | -----LQTAQTVVVRGI  |
